# Supplementary material for: Direct-to-consumer tests advertised online in Australia and their implications for medical overuse: systematic online review and a typology of clinical utility
Source: HighWire-hosted journal article supplement (doi:10.1136/bmjopen-2023-074205), 2023-12-01

Supplemental Figure 1. Levels of distinctions in analysis

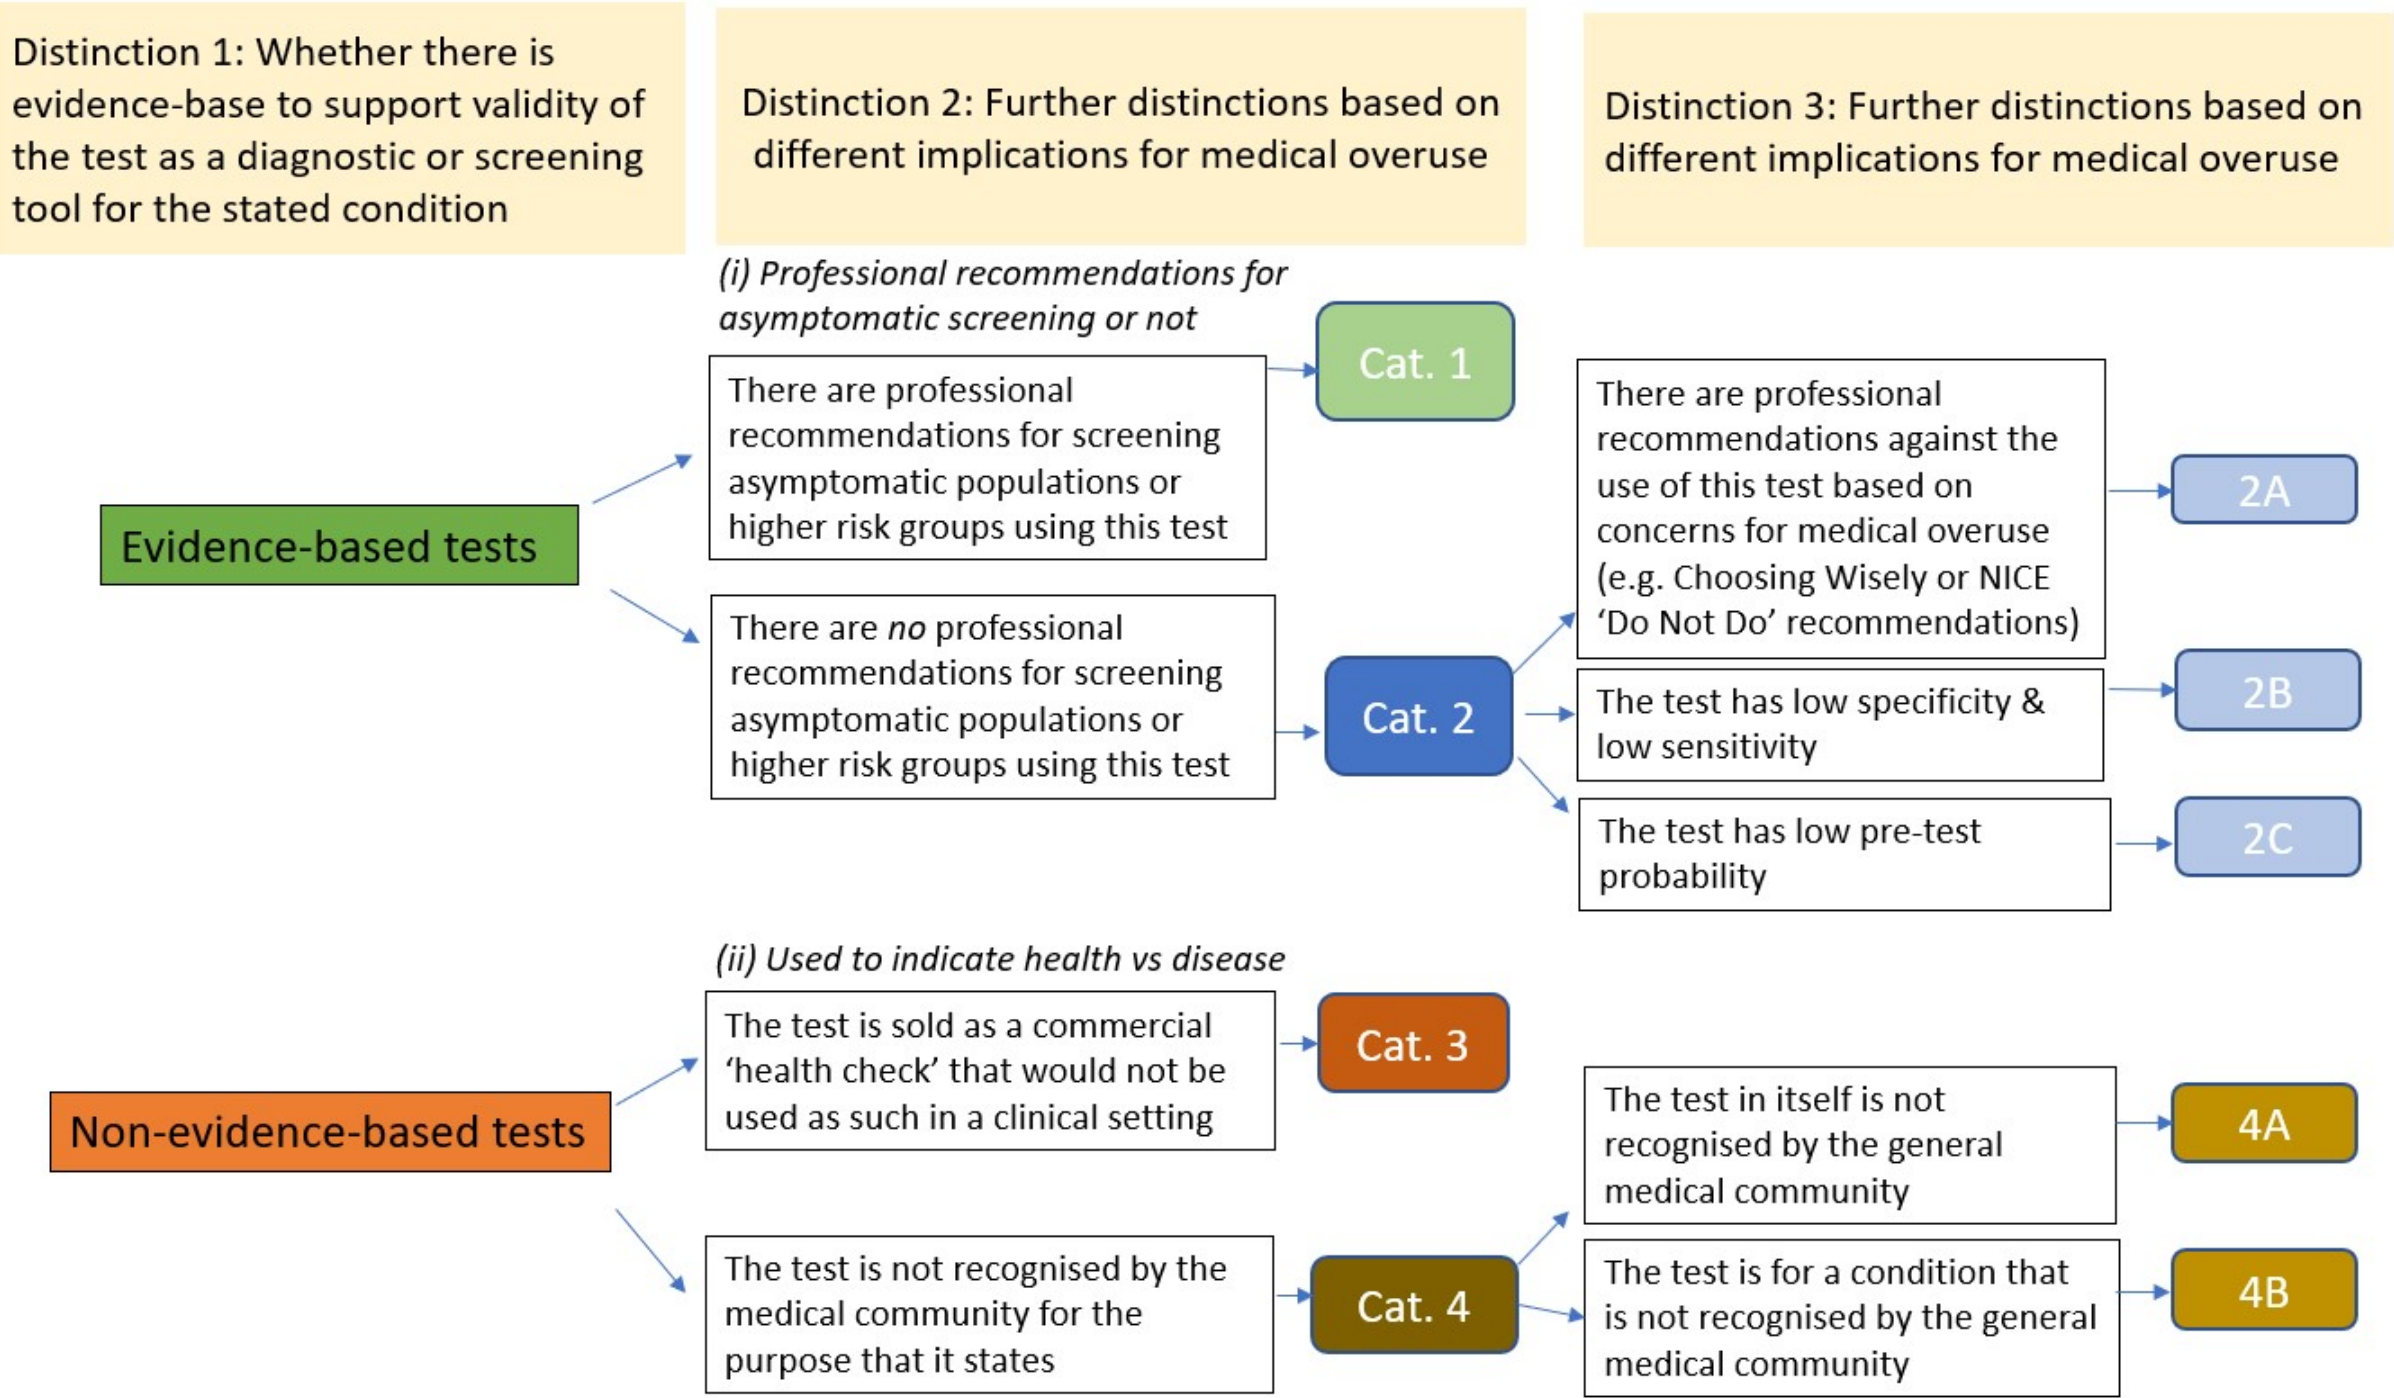

Supplement: bmjopen-2023-074205supp002_data_supplement.pdf [file bmjopen-2023-074205supp002_data_supplement.pdf]
